# Supplementary figures and images for: Risk prediction for metastasis of clear cell renal cell carcinoma using digital multiplex ligation‐dependent probe amplification
Source: PubMed Central journal article supplement — Cancer Sci. 2021 Nov 3;113(1):297–307. doi: 10.1111/cas.15170 (PMC8748218; doi:10.1111/cas.15170), 2021-11-03

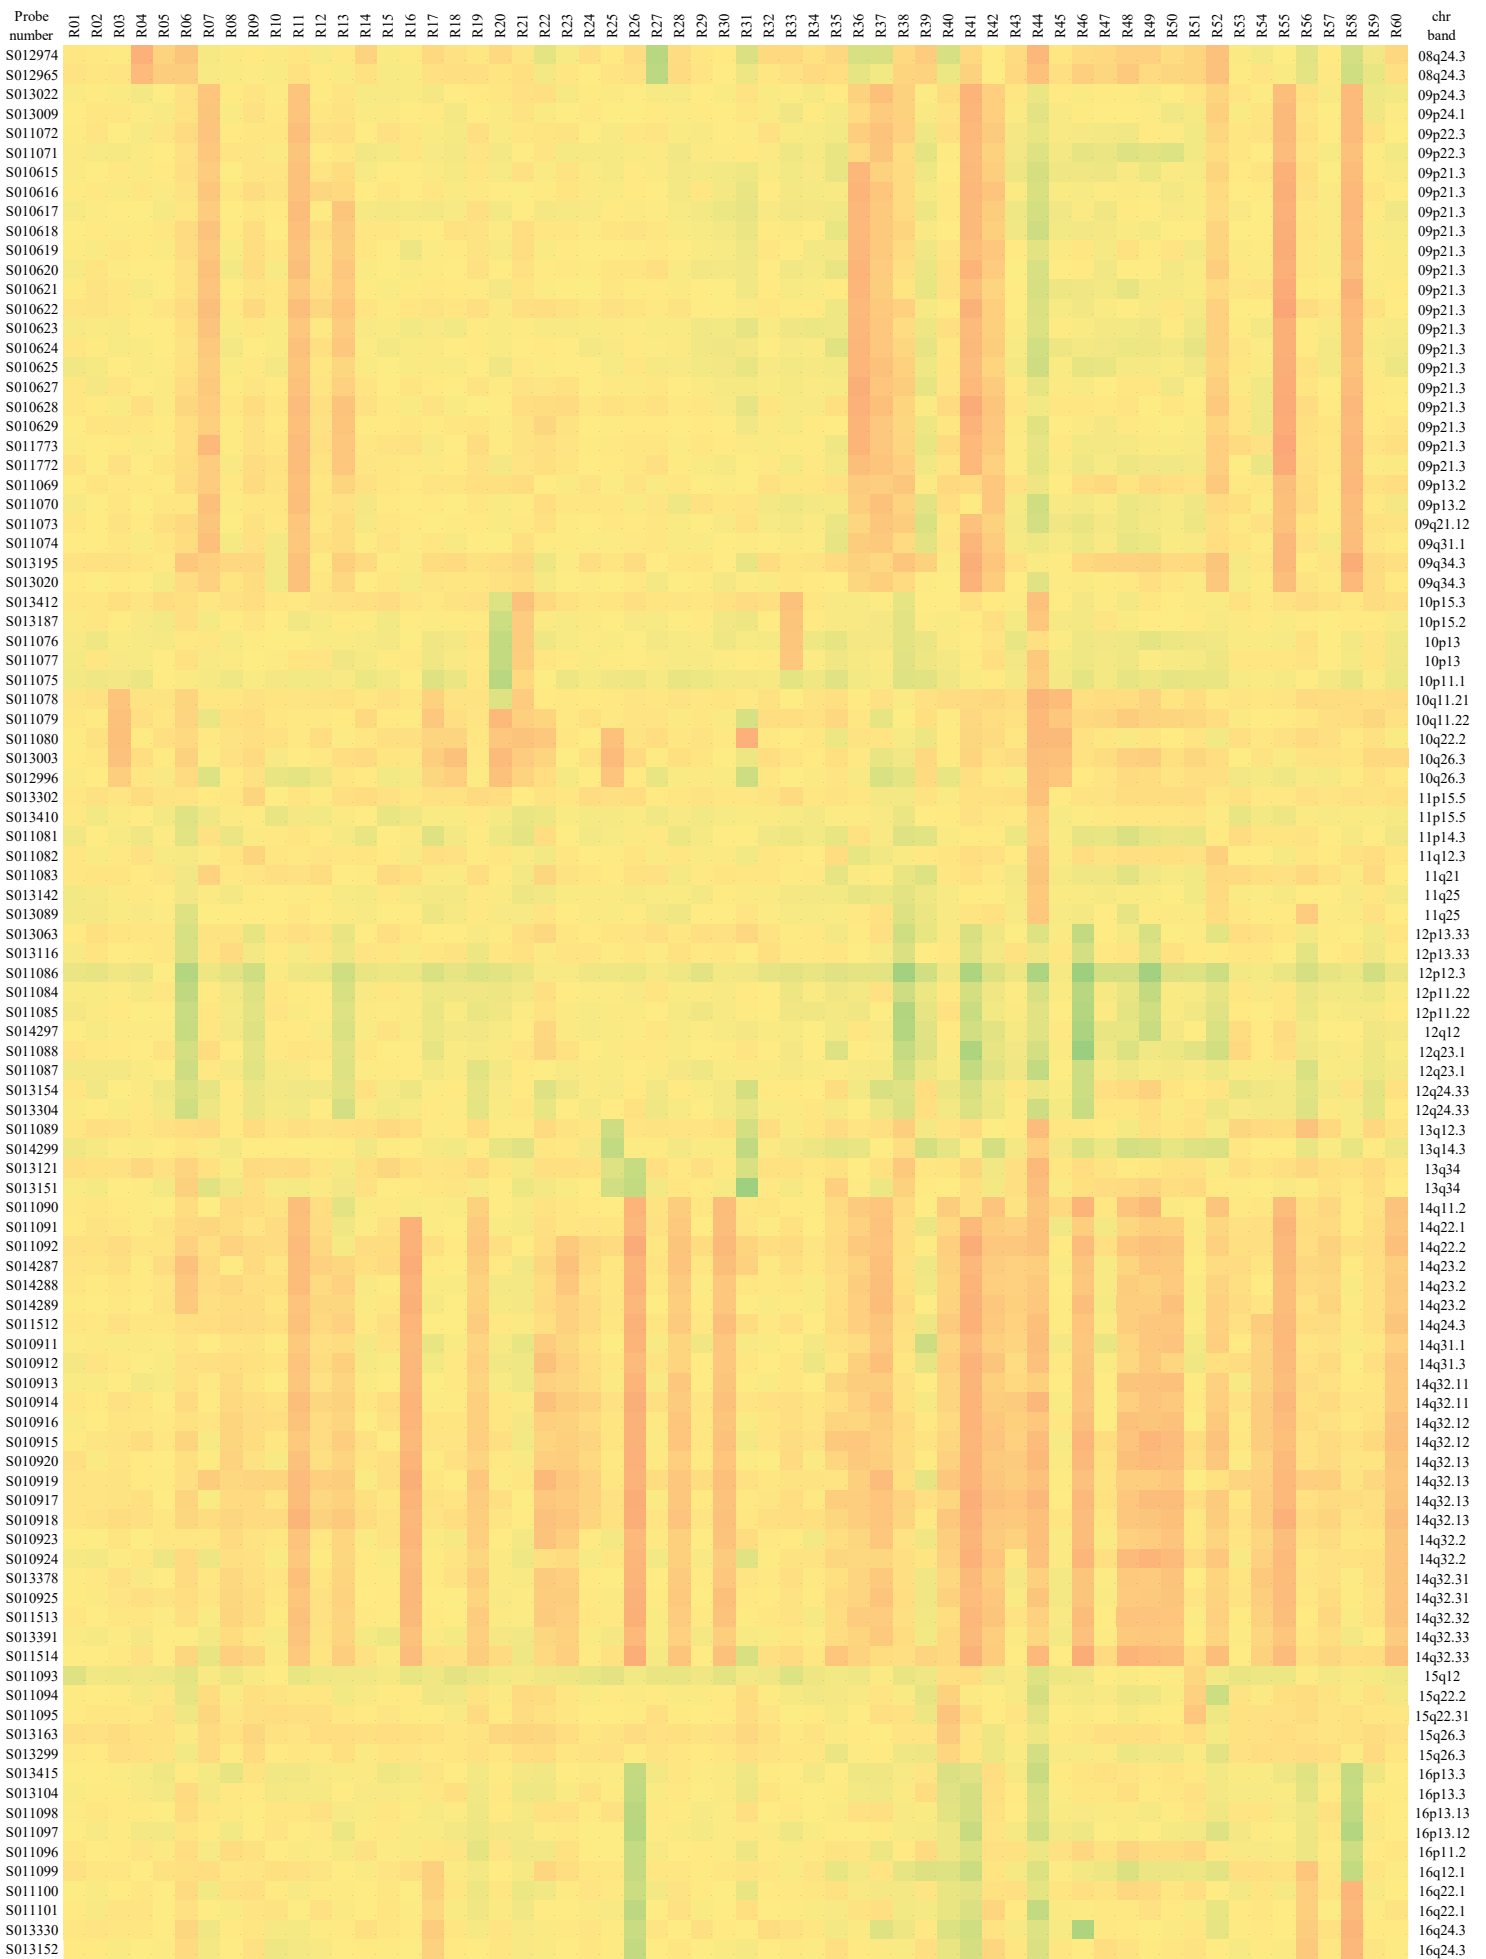

Supplement: CAS-113-297-s002.pdf [file CAS-113-297-s002.pdf]
